# Supplementary material for: Carboxylate BODIPY integrated in MOF-5: easy preparation and solid-state luminescence
Source: Royal Society of Chemistry journal article supplement (doi:10.1039/d3tc02581k), 2023-01-01
Supplement: d3tc02581k1.pdf [file d3tc02581k1.pdf]

## Carboxylate BODIPY integrated in MOF-5: easy preparation and solid state luminescence

Alexis Tran<sup>a</sup>, Marion Leroux<sup>a</sup>, Clément Michelin<sup>a</sup>, François Réveret<sup>a</sup>, Damien Boyer<sup>a</sup>, Federico Cisnetti<sup>\*a</sup>

Université Clermont Auvergne, Clermont Auvergne INP, CNRS, ICCF, F-63000 Clermont-Ferrand. \* [federico.cisnetti@uca.fr](mailto:federico.cisnetti@uca.fr)

### Supporting Information

#### Contents

**Table S1:** Relevant literature comparisons

**Fig. S1:** <sup>1</sup>H and <sup>13</sup>C NMR spectra of organic compounds

**Fig. S2:** MOF@BP-COO<sup>-</sup> samples after synthesis and centrifugation under daylight.

**Fig. S3:** MOF@BP-COO<sup>-</sup> samples after synthesis and centrifugation under 365 nm UV lamp.

**Fig. S4:** Structure of BP2, its excitation and emission ( $\lambda_{exc} = 504$  nm) spectra in EtOH.

**Fig. S5:** first and second supernatant for the attempted synthesis of MOF@BP2 under UV at 365 nm. MOF-5 after centrifugation in the centrifugation tube (not luminescent).

**Fig. S6:** Evolution of the emission spectra ( $\lambda_{ex} = 525$  nm) of the MOF@BP-COO<sup>-</sup><sub>10.6%</sub> sample after several hours in chloroform.

**Fig. S7:** Adsorption and desorption isotherms of the MOF-5 and the MOF@BP-COO<sup>-</sup><sub>10.6%</sub> sample.

**Fig. S8:** Evolution of the absorption spectra of BP-COO<sup>-</sup> in solution (DMF/Et<sub>3</sub>N; 75/1; v/v) after 3 months

**Fig. S9:** Absorbance standard curve of BP-COO<sup>-</sup> in solution (DMF/Et<sub>3</sub>N; 75/1; v/v) as function of the concentration

**Fig. S10:** Absorbance standard curve of BP-COO<sup>-</sup> in KBr pellets as function of the mass % of BP-COOH in the pellets

**Fig. S11:** Evolution of the PLQY<sub>int</sub>, the absorption and the PLQY<sub>abs</sub>, as function of the excitation wavelength for the different MOF@BP-COO<sup>-</sup><sub>x%</sub> samples

**Fig. S12:** TGA analysis of the MOF@BP-COO<sup>-</sup><sub>10.6%</sub> and the MOF-5.

**Fig. S13:** Diffractogram of MOF@BP-COO<sup>-</sup><sub>10.6%</sub> after 2h30 and 8h of synthesis.

**Fig. S14:** Picture of BP2S-COOH in solid state and in solution (DMF/Et<sub>3</sub>N ; 75/1 ; v/v) under daylight and UV (365 nm).

**Fig. S15:** Picture of the MOF@BP2S-COO<sup>-</sup> synthesized under daylight and UV (365 nm).

**Fig. S16:** Absorbance standard curve of BP2S-COO<sup>-</sup> in solution (DMF/Et<sub>3</sub>N ; 75/1 ; v/v) function of the concentration.

**Fig. S17:** Evolution of the PLQY<sub>int</sub>, the absorption and the PLQY<sub>abs</sub>, as function of the excitation wavelength for the MOF@BP2S-COO<sup>-</sup><sub>5.2%</sub>

**Table S1: Relevant literature comparisons**

| Reference | BODIPY (and other strut(s) if present)                                                                                                                             | Metal ion(s)                                    | Synthetic method                                                                                      | PLQY or other luminescence property reported                                 |
|-----------|--------------------------------------------------------------------------------------------------------------------------------------------------------------------|-------------------------------------------------|-------------------------------------------------------------------------------------------------------|------------------------------------------------------------------------------|
| Ref 17    | 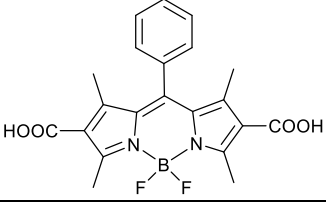<br>HOOC-COOH                                                                     | Zn <sup>2+</sup> , Cd <sup>2+</sup>             | Direct Solvothermal synthesis (presence of acid)                                                      | < 2% PLQY <sub>int</sub>                                                     |
| Ref 18    | <br>1,4-benzenedicarboxylic acid or 1,3,5-benzenetricarboxylic acid               | Zn <sup>2+</sup> , Cd <sup>2+</sup>             | Direct Solvothermal synthesis (presence of acid)                                                      | PLQY not reported (“strong photoluminescence”)                               |
| Ref 19    | <br>4,4'-biphenyldicarboxylic acid                                                | Zn <sup>2+</sup>                                | Direct solvothermal synthesis (presence of acid)                                                      | PLQY not reported (scope of ref. 19 is photocatalysis)                       |
| Ref 20    | <br>anthracene dicarboxylic acid                                                | Zn <sup>2+</sup>                                | Direct solvothermal synthesis (presence of acid)                                                      | 0.5% PLQY (upon excitation of the anthracene moiety, no other data reported) |
| Ref. 21   | <br>,4-dibromo-2,3,5,6-tetrakis(4-carboxyphenyl)benzene or tetraacid porphyrin) | Zn <sup>2+</sup>                                | Direct solvothermal synthesis (presence of acid). Delayed addition of BODIPY in the case of porphyrin | PLQY not reported (energy transfer from BODIPY to porphyrin evidenced)       |
| Ref 25    | <br>terephthalic acid (preformed UiO-66)                                        | Zr <sup>4+</sup> (preformed UiO-66)             | Ligand exchange                                                                                       | PLQY not reported (scope of ref 25 is X-ray tomography)                      |
| Ref. 26   | BP-alkyne and azide-functionalized 1,3,5-benzenetricarboxylic acid derivative (preformed PCN-262 derivative)                                                       | Fe <sup>3+</sup> (preformed PCN-262 derivative) | Copper-catalysed azide alkyne cycloaddition on preformed MOF                                          | PLQY not reported (fluorescence enhancement after reaction demonstrated)     |

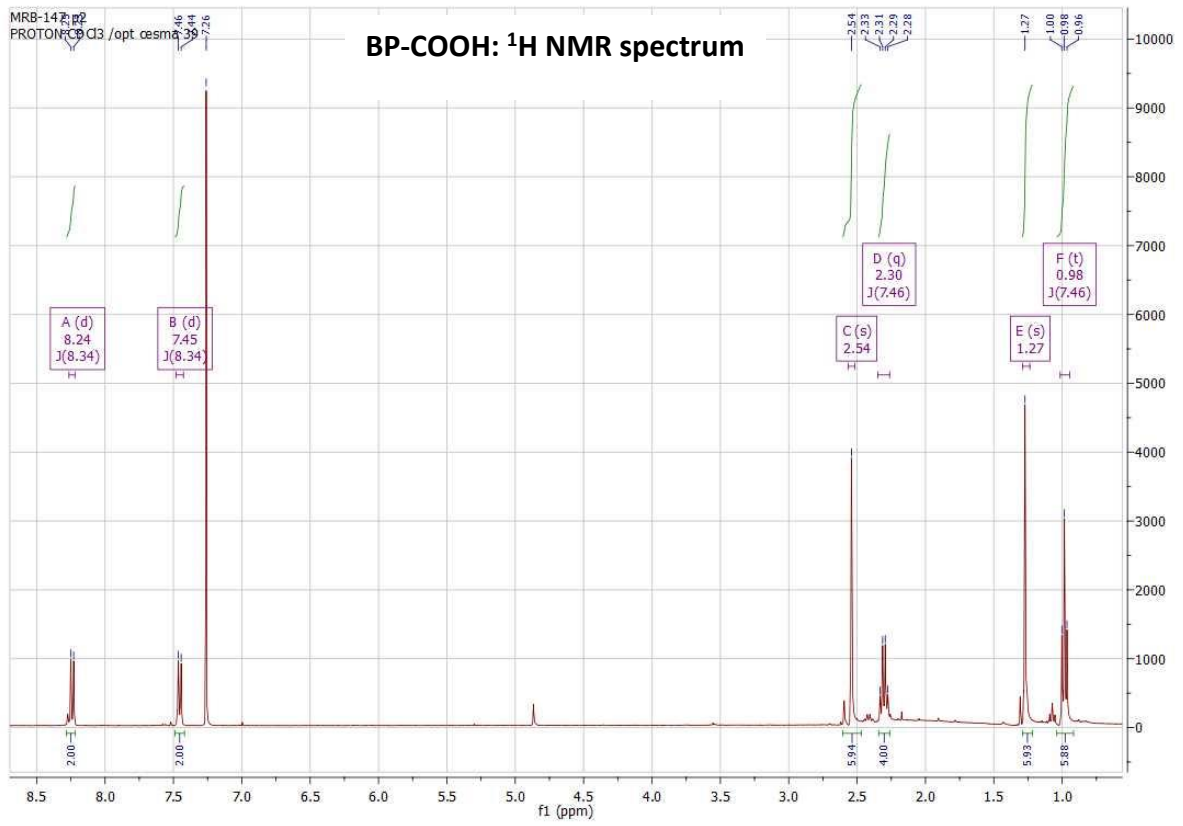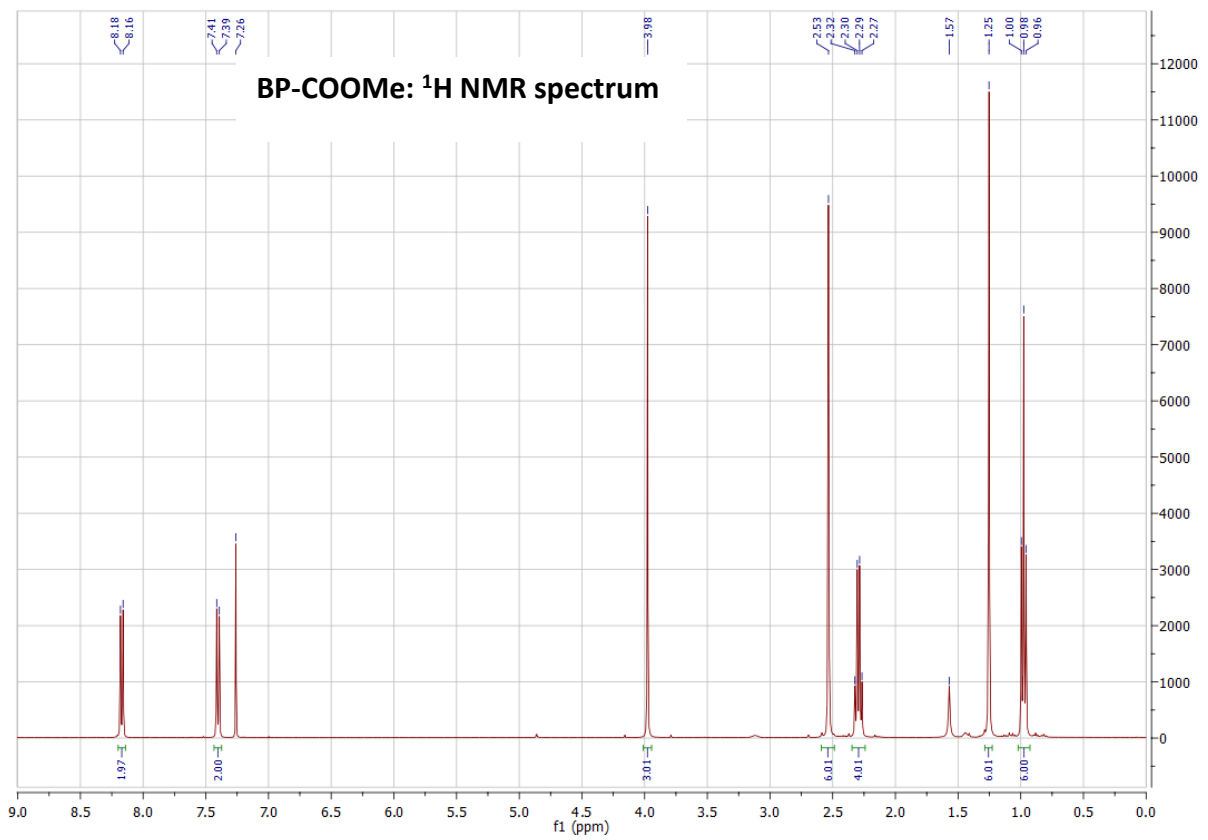

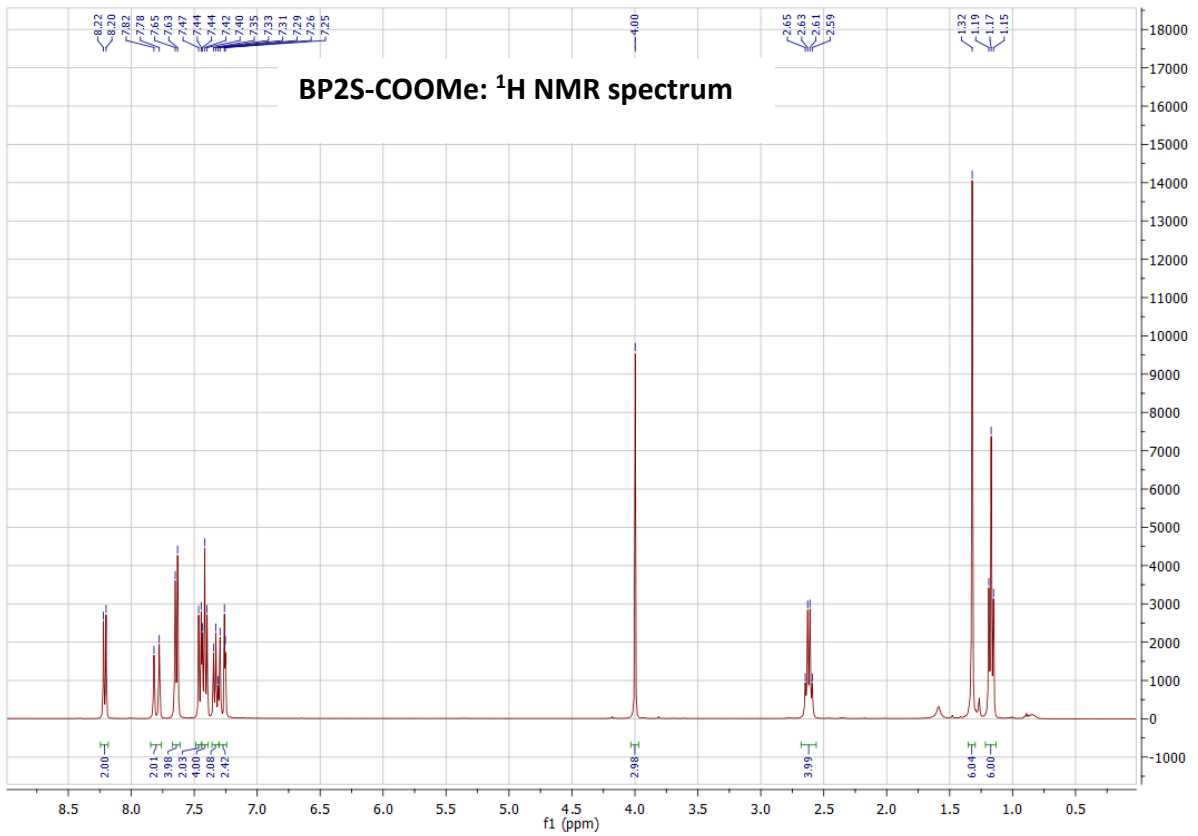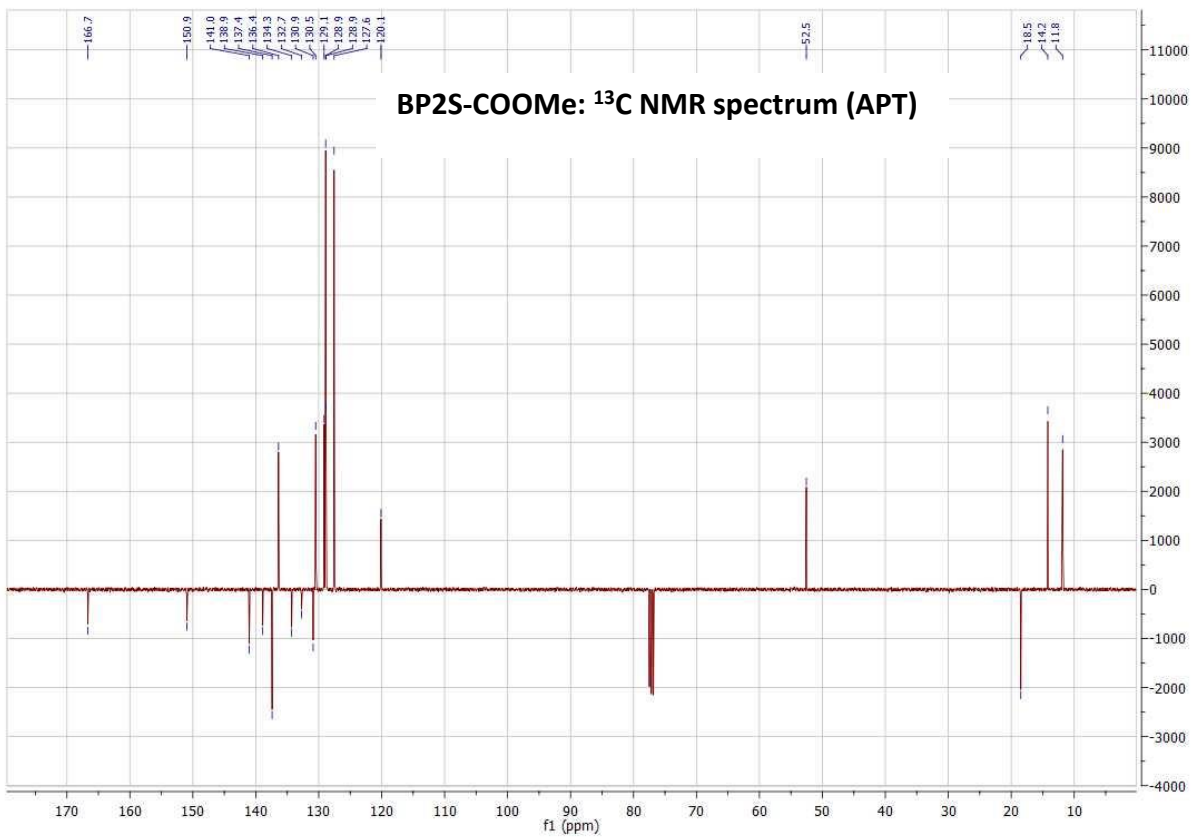

BP2S-COOMe:  $^1\text{H}$  NMR spectrum

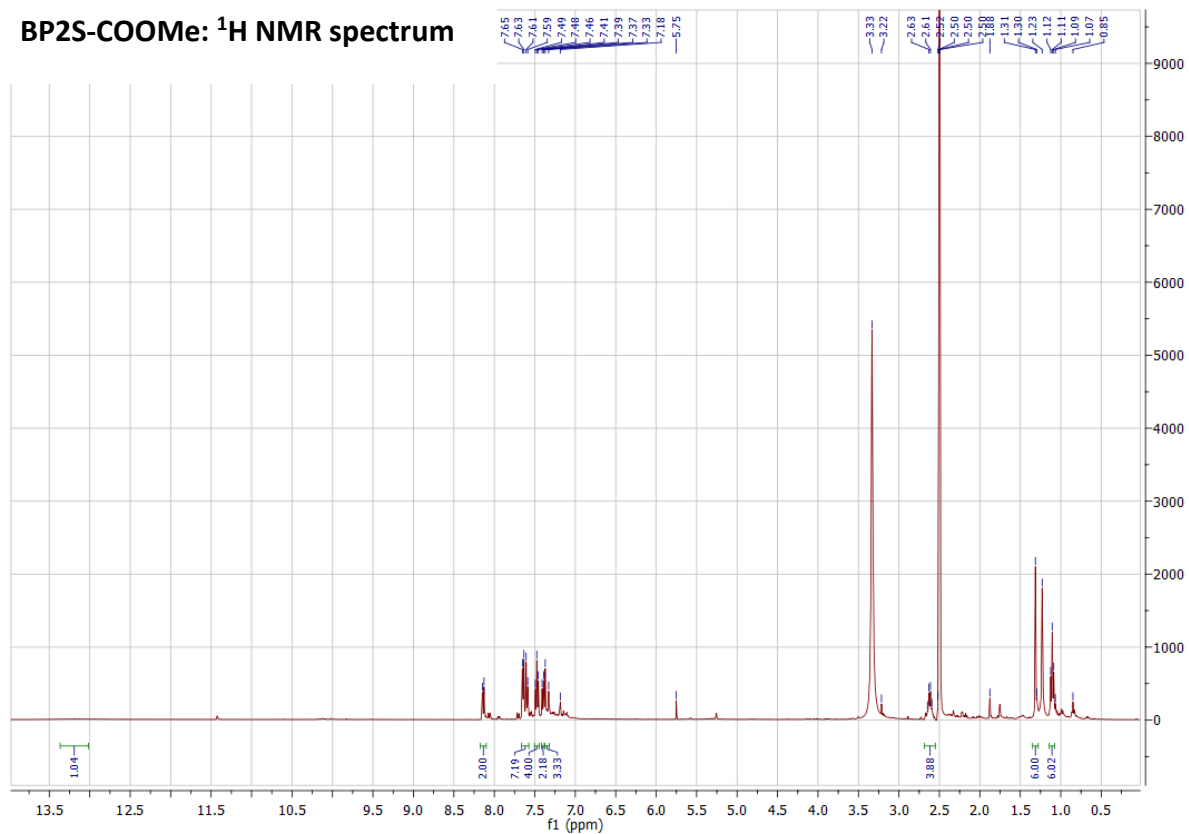

BP2S-COOH:  $^{13}\text{C}$  NMR spectrum (APT)

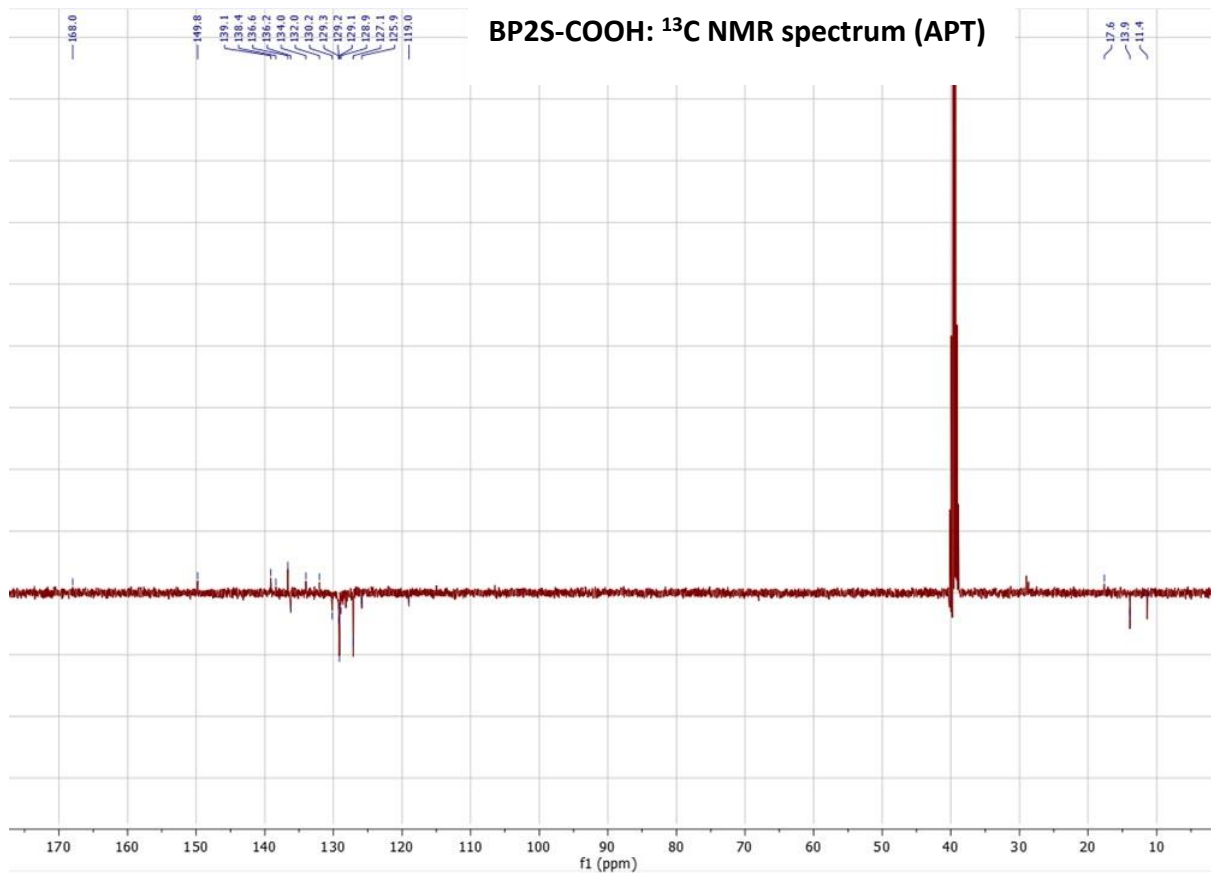

Fig. S1:  $^1\text{H}$  and  $^{13}\text{C}$  NMR spectra of organic compounds

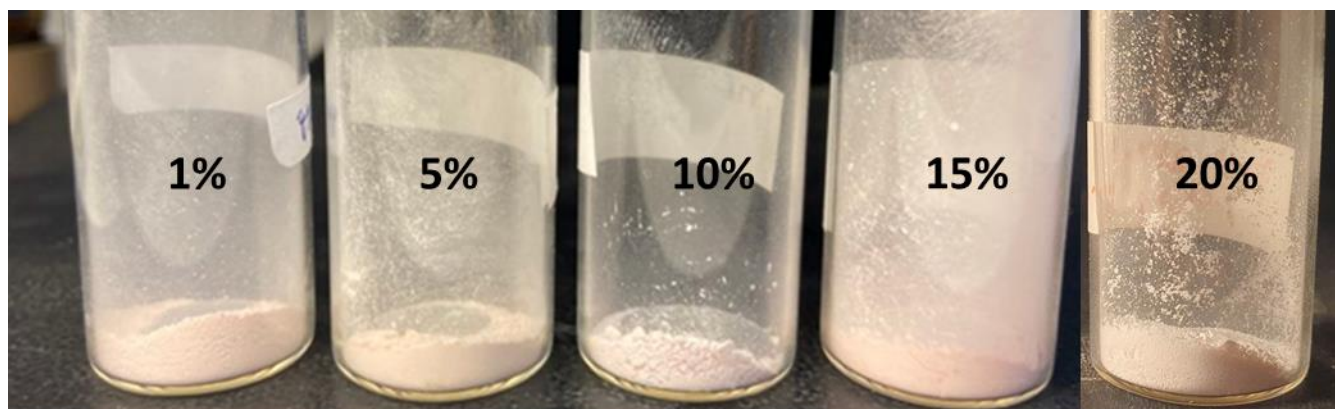

**Fig. S2:** MOF@BP-COO<sup>-</sup> samples after synthesis and centrifugation under daylight.

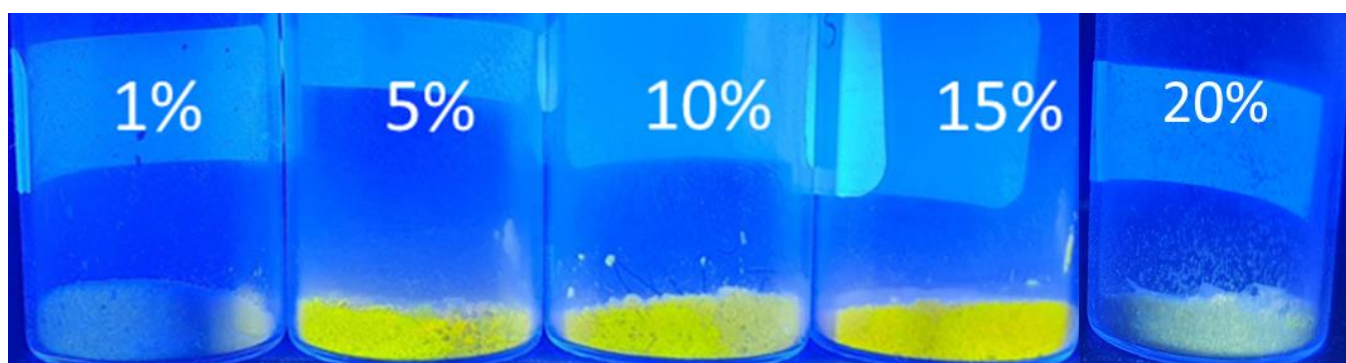

**Fig. S3:** MOF@BP-COO<sup>-</sup> samples after synthesis and centrifugation under 365 nm UV lamp.

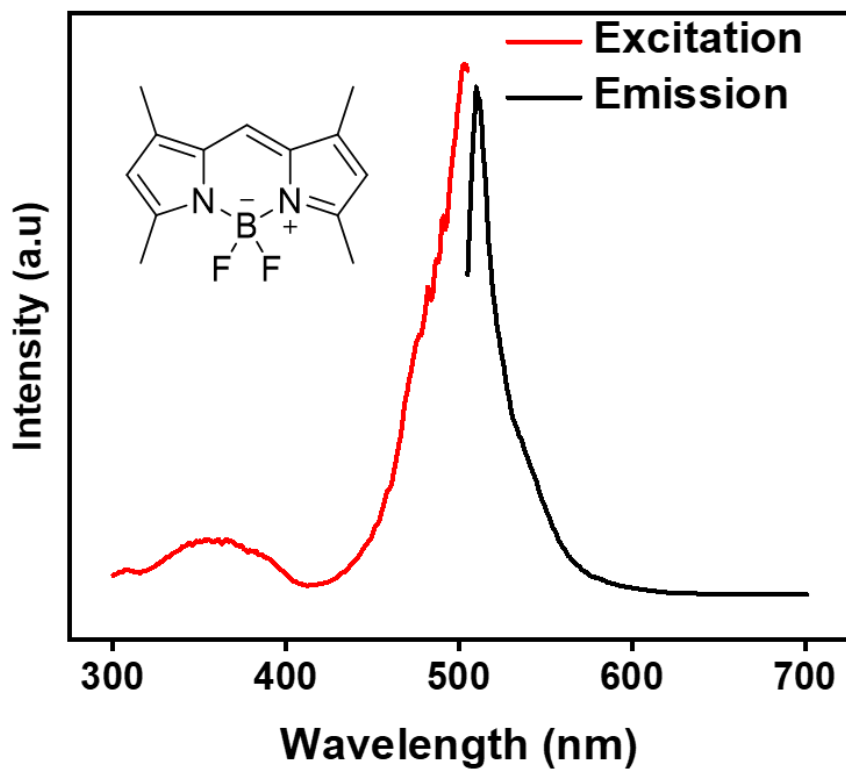

**Fig. S4:** Structure of BP2, its excitation ( $\lambda_{em} = 510$  nm) and emission ( $\lambda_{exc} = 504$  nm) spectra in EtOH at  $1.10^{-5}$  mol.L $^{-1}$ .

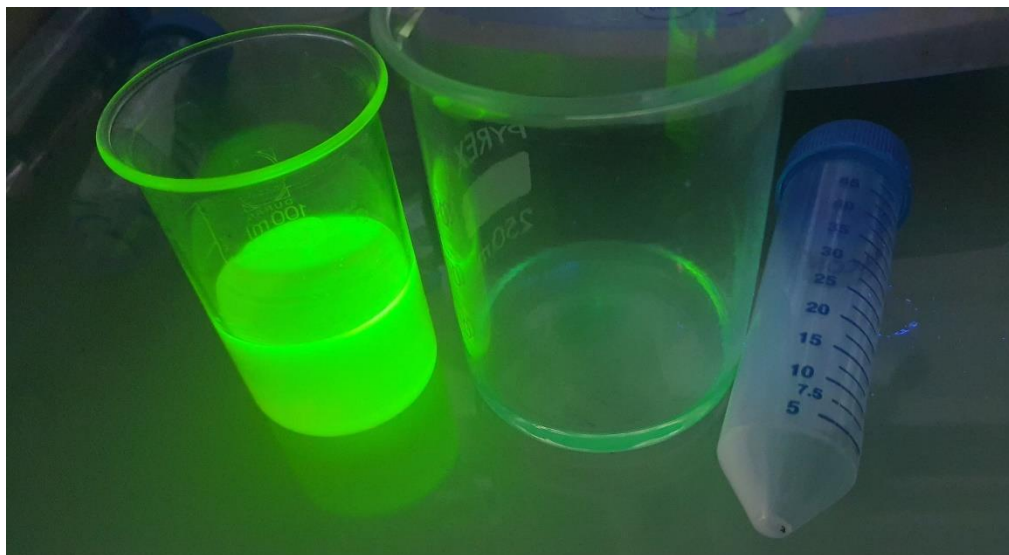

**Fig. S5:** From the right to the left: first and second supernatant for the attempted synthesis of MOF@BP2 under UV at 365 nm. MOF-5 after centrifugation in the centrifugation tube (not luminescent).

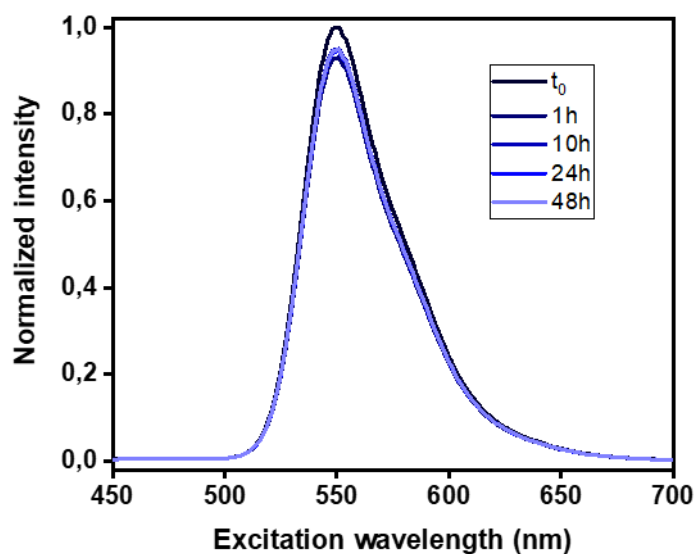

**Fig. S6:** Evolution of the emission spectra ( $\lambda_{\text{ex}} = 525 \text{ nm}$ ) of a MOF@BP-COO<sup>-</sup><sub>10.6%</sub> sample after several hours in chloroform.

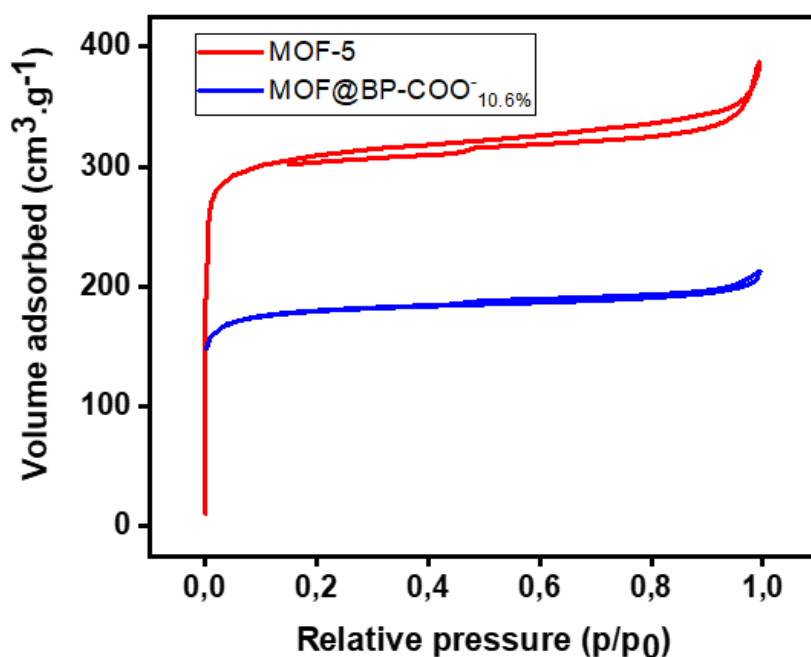

**Fig. S7:** Adsorption and desorption isotherms of the MOF-5 and the MOF@BP-COO<sup>-</sup><sub>10.6%</sub> sample. The specific surface area for the MOF-5, measured by BET is 957 m<sup>2</sup>·g<sup>-1</sup> and 560 m<sup>2</sup>·g<sup>-1</sup> for the MOF@BP-COO<sup>-</sup><sub>10.6%</sub>.



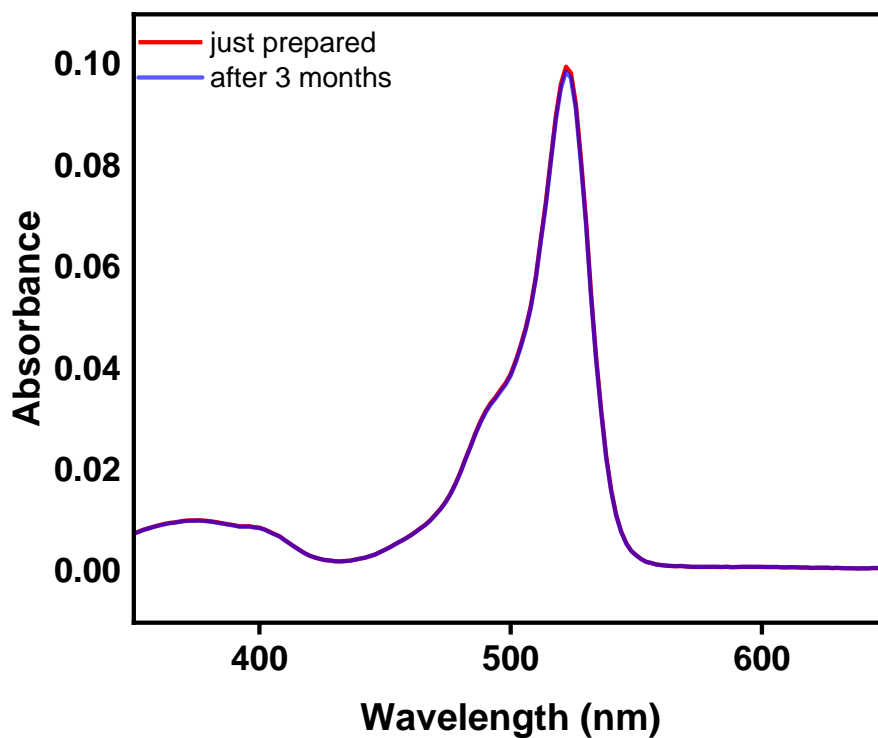

**Fig. S8:** Evolution of the absorption spectra of BP-COO<sup>-</sup> in solution (DMF/Et<sub>3</sub>N: 75/1; v/v) after 3 months ( $3.4 \cdot 10^{-5} \text{ mol.L}^{-1}$  stock solution diluted 100 times).

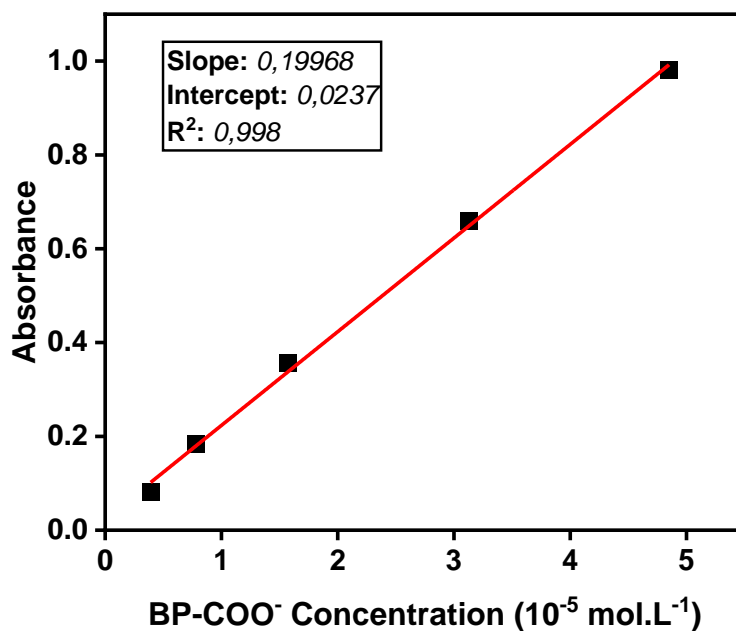

**Fig. S9:** Absorbance standard curve at  $\lambda_{\text{max}}$  for BP-COO<sup>-</sup> in solution (DMF/Et<sub>3</sub>N; 75/1; v/v) as a function of the concentration

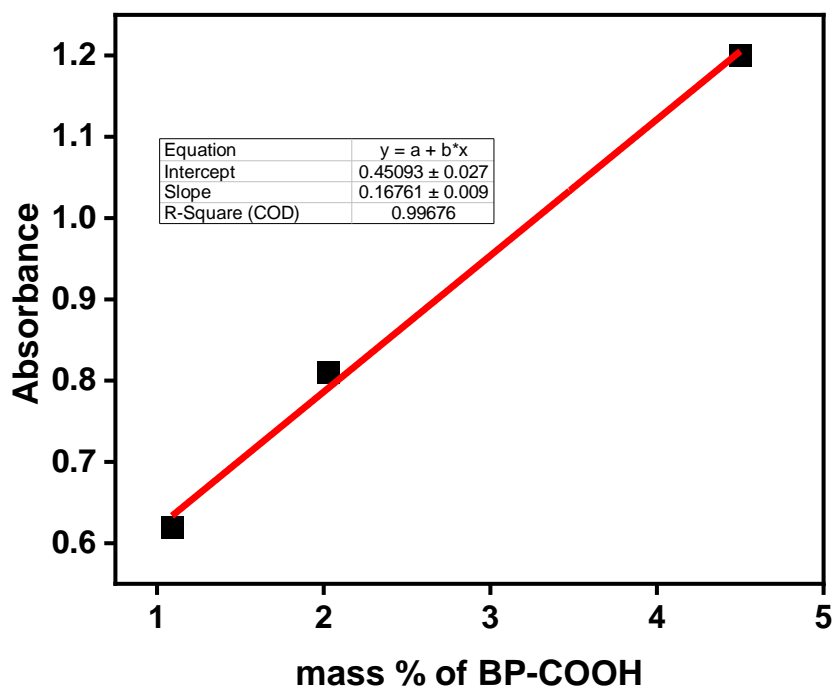

**Fig. S10:** Absorbance standard curve at  $\lambda_{\max}$  for BP-COO<sup>-</sup> in KBr pellets as a function of the mass % of BP-COOH in the pellets

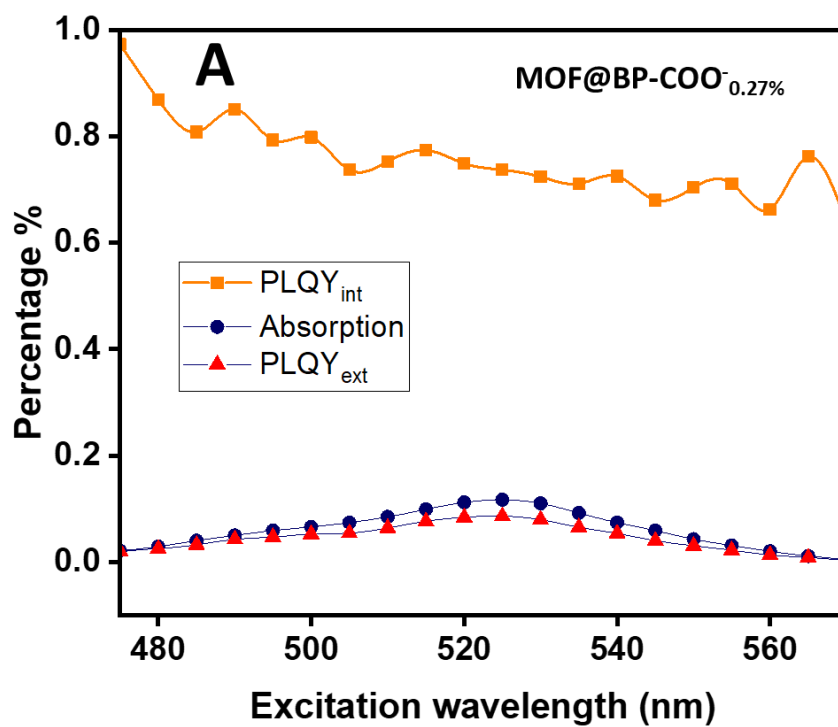

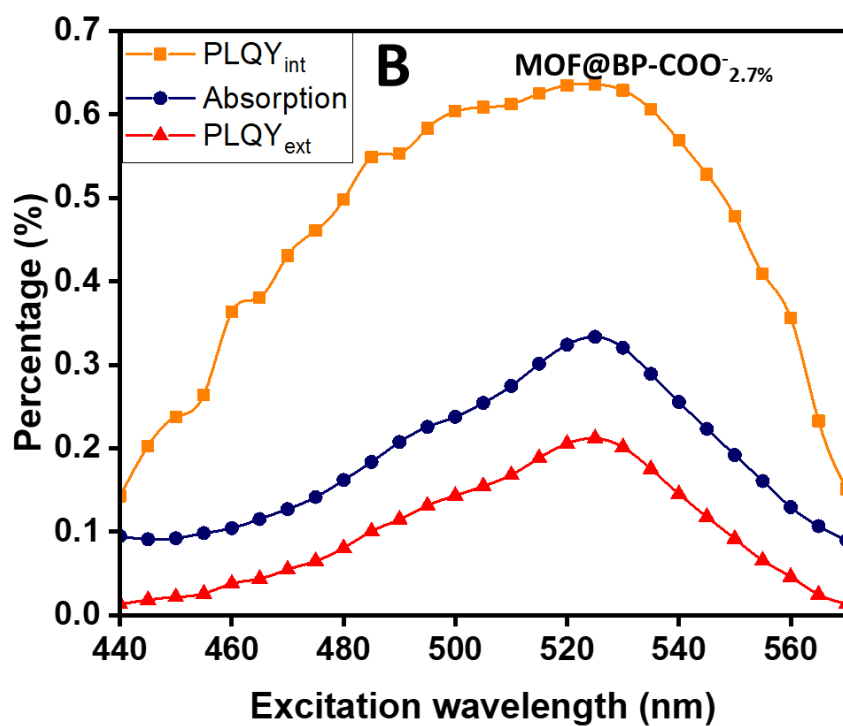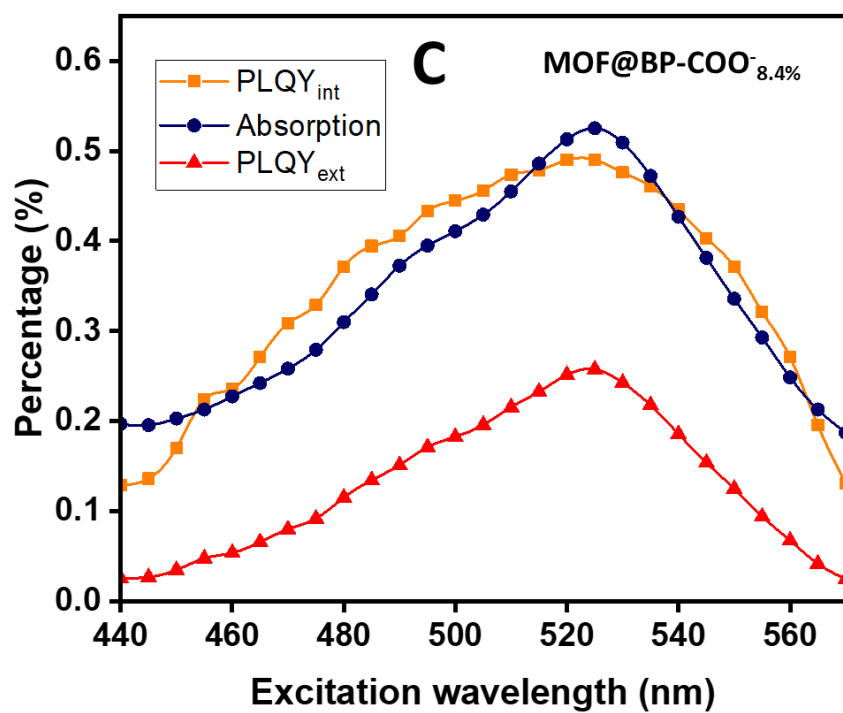

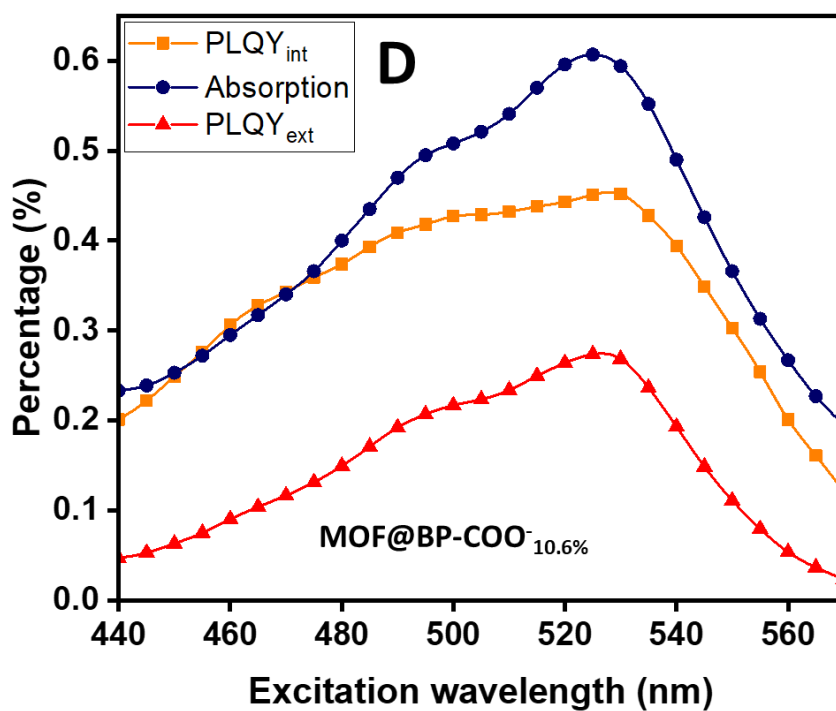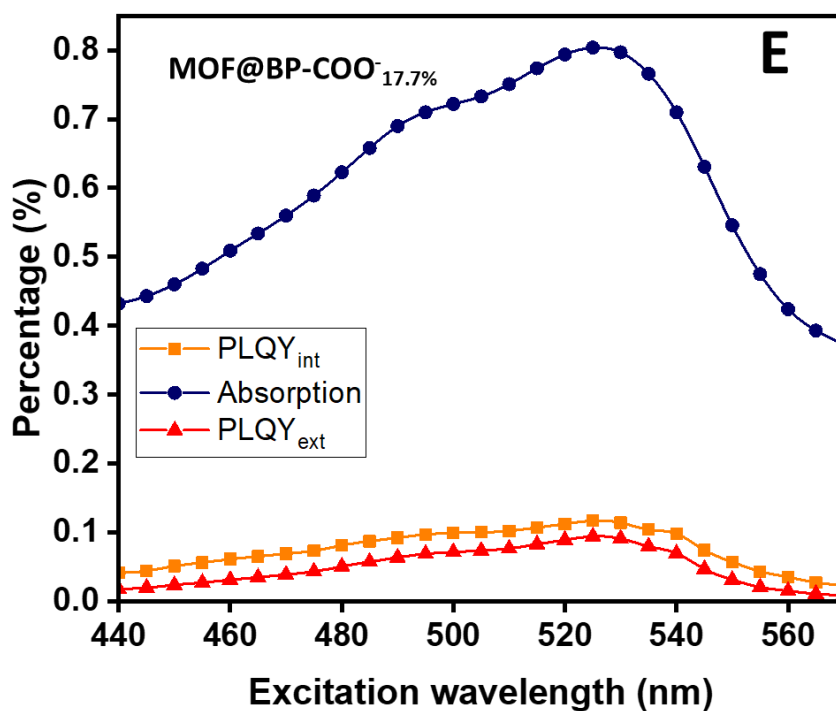

**Fig. S11:** Evolution of PLQY<sub>int</sub>, the absorption coefficient and PLQY<sub>ext</sub>, as function of the excitation wavelength for the different MOF@BP-COO<sub>x%</sub> samples (A:  $x = 0.27\%$ , B:  $x = 2.7\%$ , C:  $x = 8.4\%$ , D:  $x = 10.6\%$ , E:  $x = 17.7\%$ ).

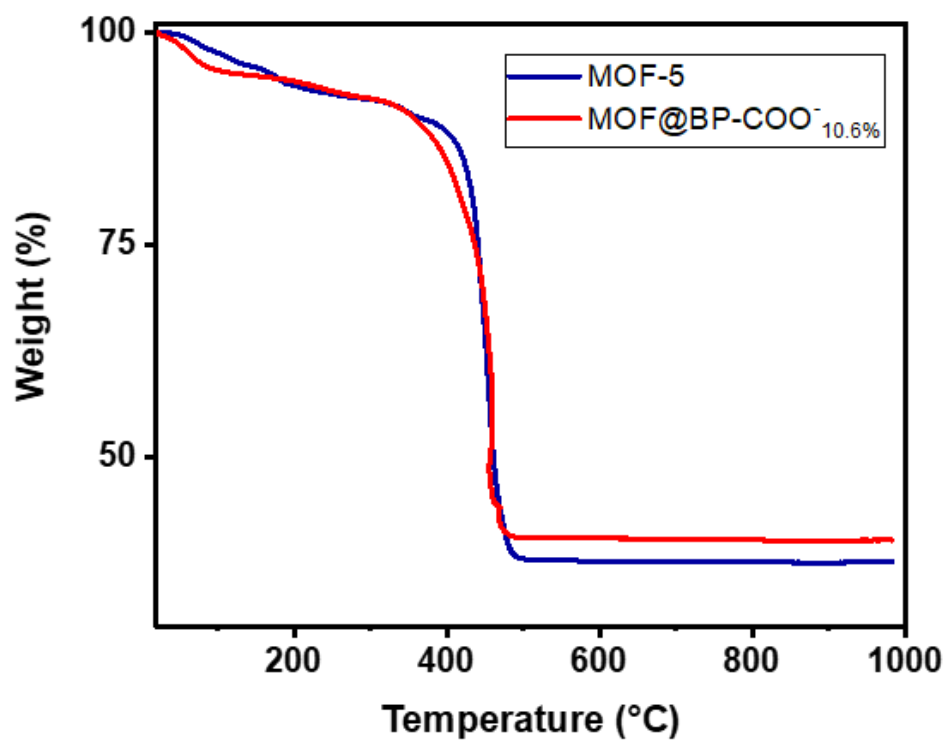

**Fig. S12:** TGA analysis of a MOF@BP-COO<sup>-</sup><sub>10.6%</sub> compared with a MOF-5 sample prepared in the same conditions.

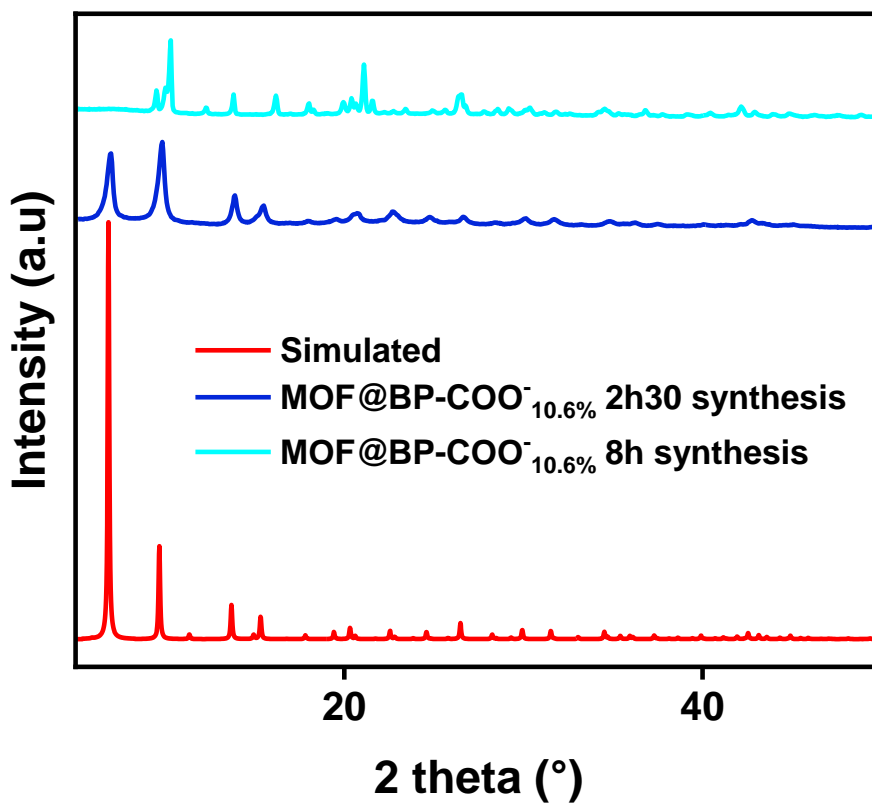

**Fig. S13:** Diffractogram of MOF@BP-COO<sup>-</sup><sub>10.6%</sub> after 2h30 and 8h of synthesis.

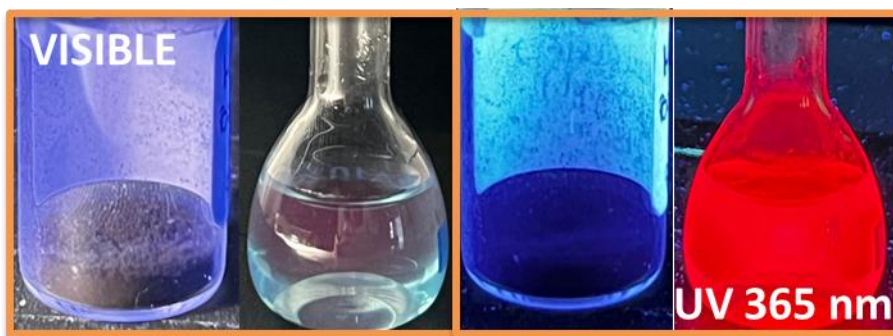

**Fig. S14:** Picture of BP2S-COOH in solid state and in solution (DMF/Et<sub>3</sub>N; 75/1; v/v) under daylight and UV (365 nm).

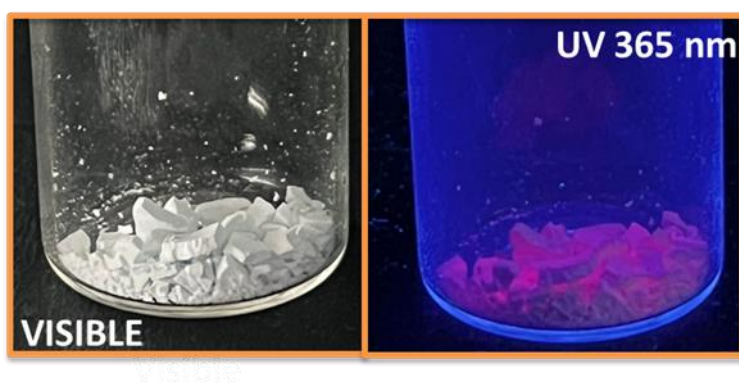

**Fig. S15:** Picture of the synthesized MOF@BP2S-COO<sup>-</sup> under daylight and UV (365 nm).

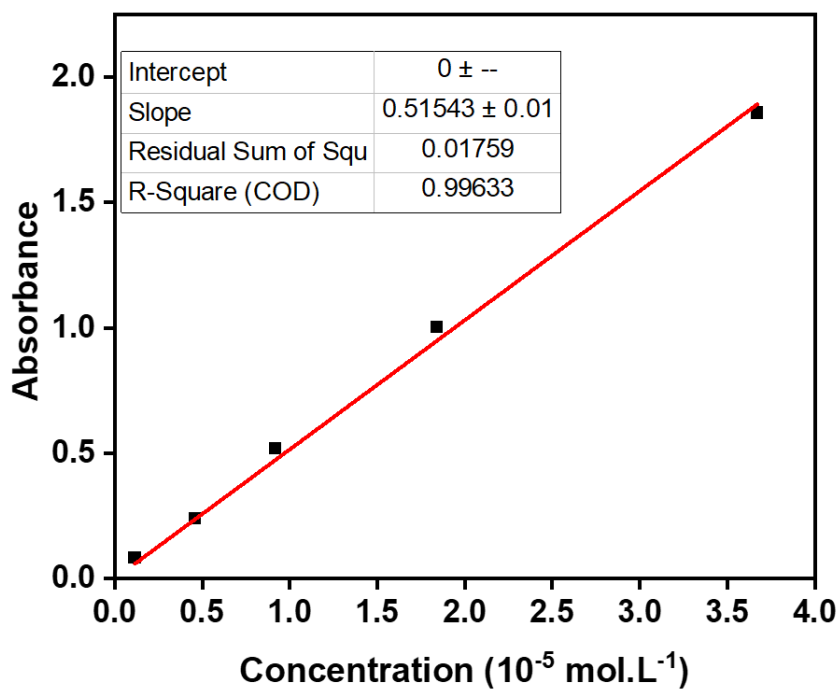

**Fig. S16:** Absorbance standard curve at  $\lambda_{\max}$  for BP2S-COO<sup>-</sup> in solution (DMF/Et<sub>3</sub>N; 75/1; v/v) as a function of the concentration.

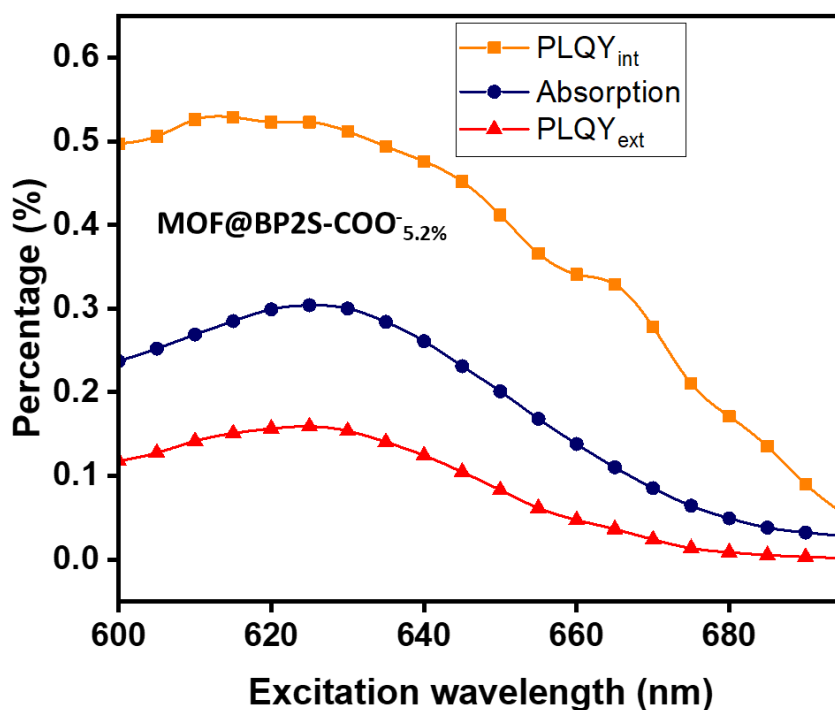

**Fig. S17:** Evolution of PLQY<sub>int</sub>, the absorption coefficient and PLQY<sub>ext</sub>, as function of the excitation wavelength for the MOF@BP2S-COO<sup>-</sup><sub>5.2%</sub>.
